# Supplementary material
Source: PubMed Central journal article supplement (PMC7771614)
Supplement: JGMED20006571.pdf [file JGMED20006571.pdf]

Merkin R, Kruger A, Bhardwaj G, Kajita GR, Shapiro L, Galen BT. Internal medicine resident work absence during the COVID-19 pandemic at a large academic medical center in New York City. *J Grad Med Educ.* 2020;12(6):682–685.

**Supplementary Data**

**FIGURE**

COVID-19 and COVID-Like Illness (CLI) in Residents per Patient Exposure Days (PED)

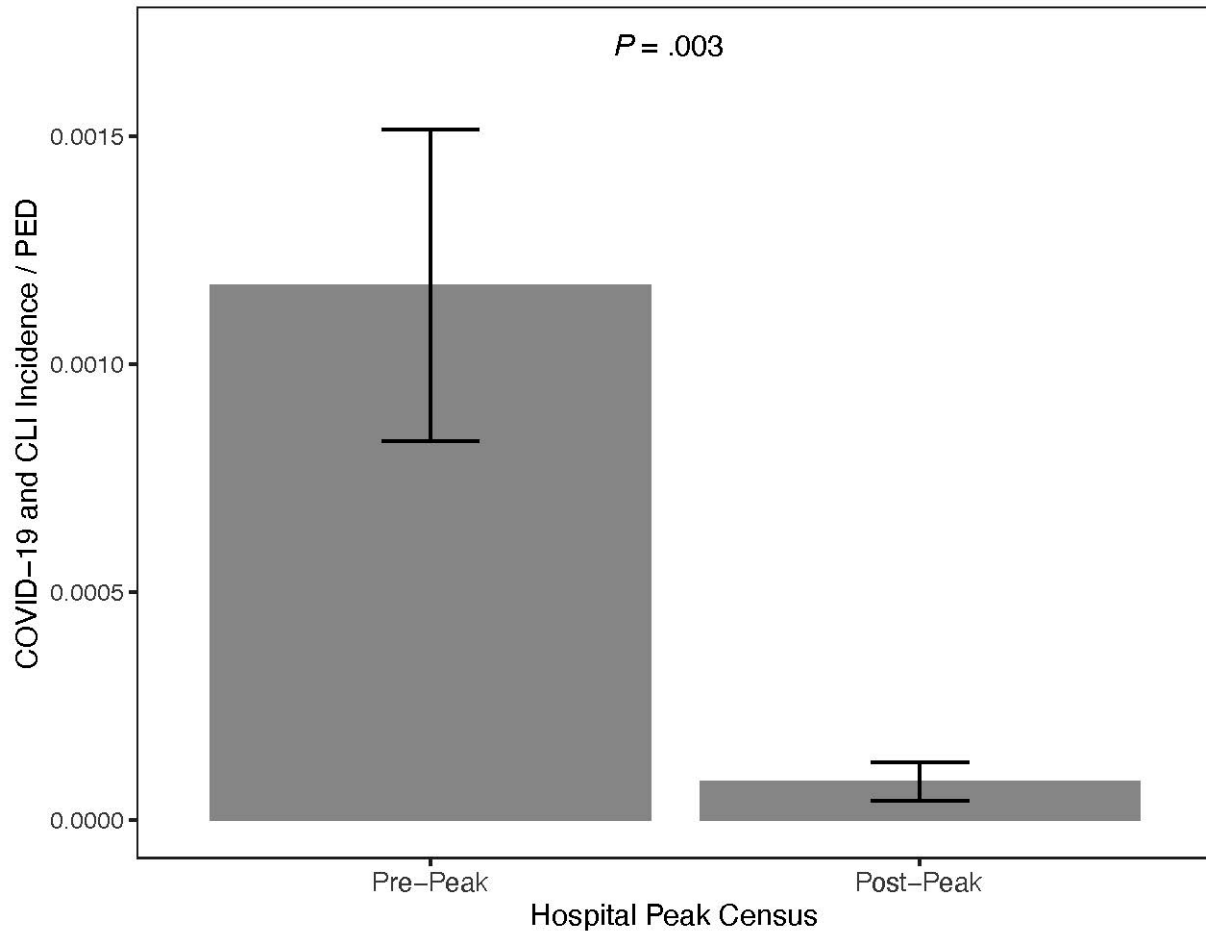

Note: Shown are the means +/- 1 standard deviation. Using CLI/PED to generate area under the curve before and after the peak MMC COVID-19 hospital census on April 10th, the post-peak resident incidence of CLI was 13.9 fold lower ( $p=0.003$ ) than pre-peak incidence of CLI after adjusting for PED (= total MMC cases \* number of days pre- or post- hospital peak).
